# Supplementary figures and images for: Rapid nucleic acid extraction from skin biopsies using a point-of-care device
Source: Royal Society of Chemistry journal article supplement (doi:10.1039/d2lc00457g), 2022-01-01

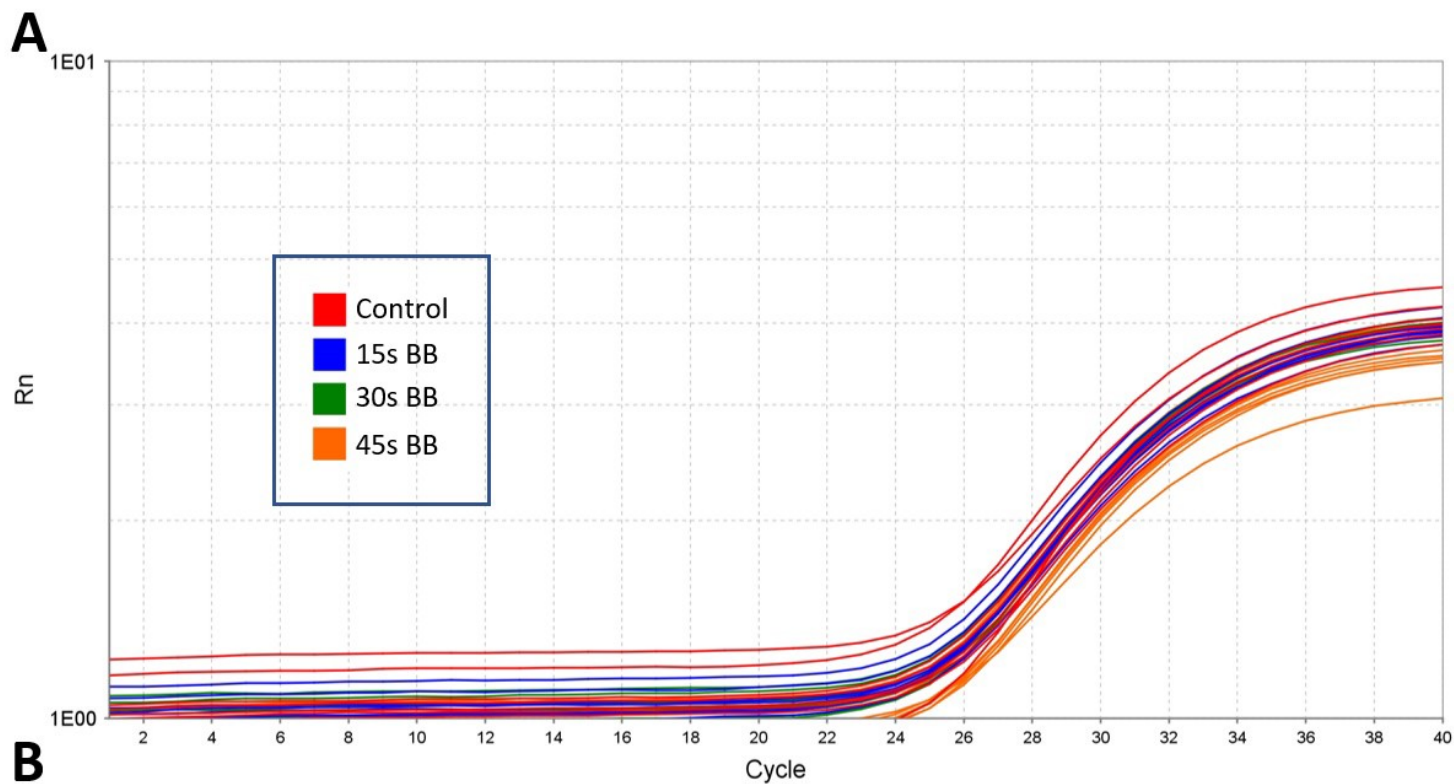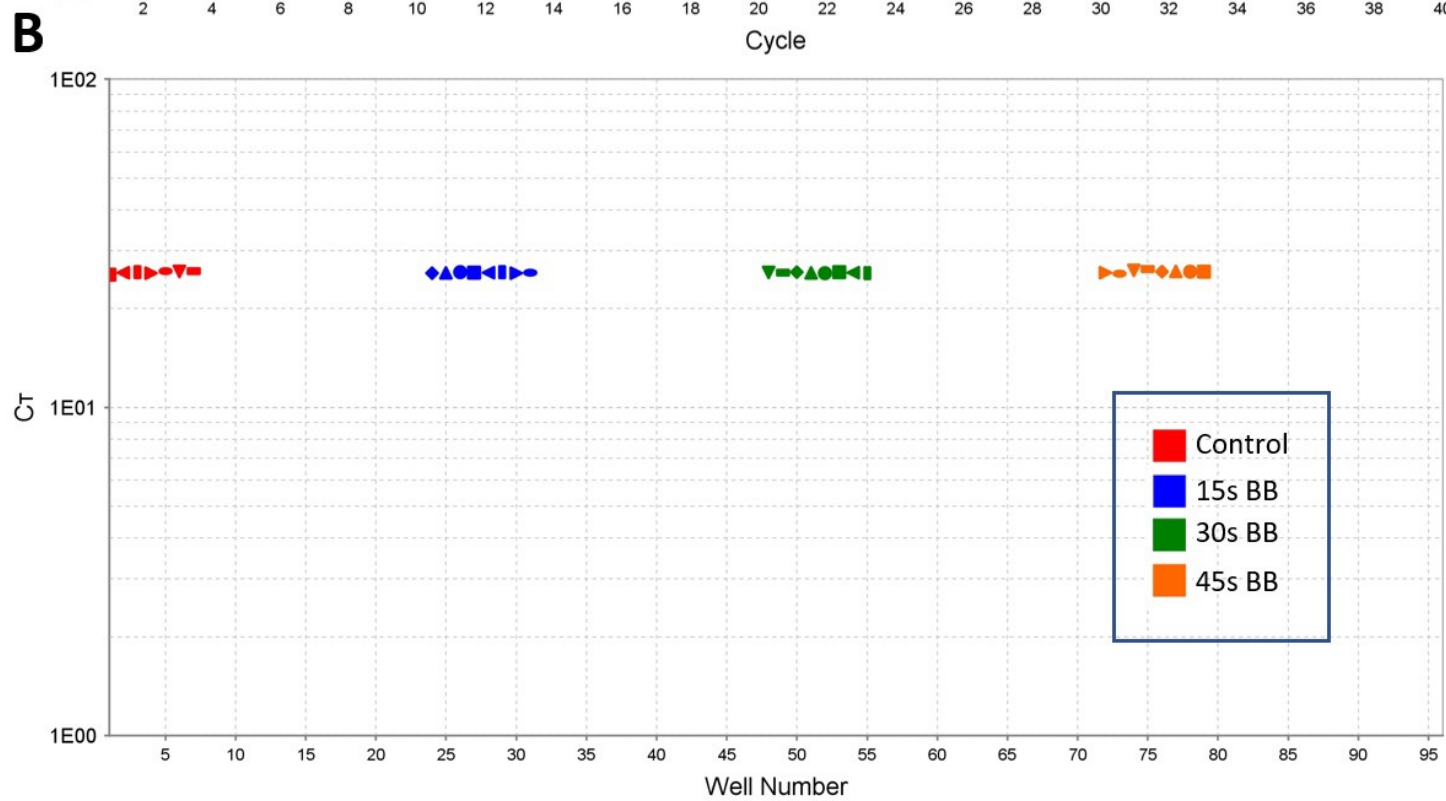

Supplement: d2lc00457g2.pdf [file d2lc00457g2.pdf]
